# Supplementary material for: Case Series: Four Cases of Anorexia Nervosa Concomitant with Central Adrenal Insufficiency
Source: Research Square preprint supplement (doi:10.21203/rs.3.rs-589860/v1), 2021-06-14
Supplement: Supplementary file 1 [file e1169148f6845844932e59e2.docx]

**Care Checklist**

| Item | Content | line/page |
| --- | --- | --- |
| Title | 1.The words “case report” should be in the title along with the area of focus | 1/1 as “Case Series” |
| Keywords | 2.Four to seven key words—include “case report” as one of the keywords | 44/3 as “case series” |
| Abstract | 3a Background: What does this case report add to the medical literature?  3b Case summary: chief complaint, diagnoses, interventions, and outcomes  3c Conclusion: What is the main “take-away” lesson from this case? | 20-23/2  24-36/2  37-39/3 |
| Introduction | 4 The current standard of care and contributions of this case with references (1-2 paragraphs) | 47-50/4 |
| Timeline | 5 Information from this case report organized into a timeline (table or figure) | none |
| Patient Information | 6a De-identified demographic and other patient or client specific information  6b Chief complaint—what prompted this visit?  6c Relevant history including past interventions and outcomes | 57-75/4-5  101-114/7  134-138/8-9  151-156/9-10  76-83/5-6  115-121/7-8  129-133/8  150-151/9  none |
| Physical Exam | 7 Relevant physical examination findings | 70/5  105-107/7  139-140/9  156-159/10 |
| Diagnostic and Assessment | 8a Evaluations such as surveys, laboratory testing, imaging, etc.  8b Diagnostic reasoning including other diagnoses considered and challenges  8c Consider tables or figures linking assessment, diagnoses and interventions  8d Prognostic characteristics where applicable | 84-94/6  121-123/8  143-145/9  168-173/10-11  Table 1 and Table 2  none |
| Intervention | 9a Types such as life-style recommendations, treatments, medications, surgery  9b Intervention administration such as dosage, frequency and duration  9c Note changes in intervention with explanation  9d Other concurrent interventions | 95-96/6  123-124/8  145-146/9  173-175/11  none  none |
| Follow-up and Outcome | 10a Clinician assessment (and patient or client assessed outcomes when appropriate)  10b Important follow-up diagnostic evaluations  10c Assessment of intervention adherence and tolerability including adverse events | 96-98/6  123-126/8  146-147/9  175-177/11  none |
| Discussion | 11a Strengths and limitations in your approach to this case  11b Specify how this case report informs practice or Clinical Practice Guidelines (CPG)  11c How does this case report suggest a testable hypothesis?  11d Conclusions and rationale | 185-191/11-12  192-198/12  200-203/12  217-221/13 |
| Patient Perspective | 12 When appropriate include the assessment of the patient or client on this episode of care | 96-97/6 |
| Informed Consent | 13 Informed consent from the person who is the subject of this case report is required by most journals | 251/15 |
| Additional Information | 14 Acknowledgement section; Competing Interests; IRB approval when required | 228-229/14  253-254/15 |

Sunao Matsubayashi, June 06, 2021

Fukuoka Tokushukai Hospital
